# Supplementary material for: Downregulation of the CCL2/CCR2 and CXCL10/CXCR3 axes contributes to antitumor effects in a mouse model of malignant glioma
Source: PubMed Central journal article supplement (PMC7499211; doi:10.1038/s41598-020-71857-3), 2020-09-17
Supplement: 41598_2020_71857_MOESM1_ESM.pdf [file 41598_2020_71857_MOESM1_ESM.pdf]

# Downregulation of the CCL2/CCR2 and CXCL10/CXCR3 axes contributes to antitumor effects in a mouse model of malignant glioma

Kenji Shono, Izumi Yamaguchi, Yoshifumi Mizobuchi, Hiroshi Kagusa, Akiko Sumi, Toshitaka Fujihara, Kohei Nakajima, Keiko T Kitazato, Kazuhito Matsuzaki, Hideyuki Saya, Yasushi Takagi

Supplementary Table 1. Antibodies used for western blot.

| Antibody                                  | Manufacturer                       | Dilution | Species | Blocking solution |
|-------------------------------------------|------------------------------------|----------|---------|-------------------|
| Cleaved caspase - 3 (Asp175)              | Cell Signaling Technology, MA, USA | 1:1000   | Rabbit  | 5% skim milk      |
| Cleaved caspase - 8 (Asp387)              | Cell Signaling Technology, MA, USA | 1:1000   | Rabbit  | 5% skim milk      |
| Cleaved caspase - 9                       | Cell Signaling Technology, MA, USA | 1:1000   | Rabbit  | 5% skim milk      |
| Cleaved PARP (Asp214)                     | Cell Signaling Technology, MA, USA | 1:1000   | Rabbit  | 5% skim milk      |
| $\beta$ -catenin                          | BD Biosciences, NJ, USA            | 1:2000   | Mouse   | 5% skim milk      |
| $\epsilon$ Myc                            | Abcam, Cambridge, UK               | 1:2000   | Rabbit  | 5% skim milk      |
| Cyclin D1                                 | Santa Cruz Biotechnology, CA, USA  | 1:500    | Rabbit  | 5% skim milk      |
| CCL2                                      | Abcam, Cambridge, UK               | 1:1000   | Rabbit  | 5% skim milk      |
| CXCL10                                    | Abcam, Cambridge, UK               | 1:1000   | Mouse   | 5% skim milk      |
| Phospho-NF- $\kappa$ B p65 (Ser536)       | Cell Signaling Technology, MA, USA | 1:1000   | Rabbit  | 3% BSA            |
| Phospho-I $\kappa$ B $\alpha$ p65 (Ser32) | Cell Signaling Technology, MA, USA | 1:1000   | Rabbit  | 3% BSA            |
| $\beta$ -actin                            | Sigma Aldrich MO, USA              | 1:5000   | Mouse   | 5% skim milk      |

Supplementary Table 2. Antibodies used for immunofluorescence staining.

| Antibody | Manufacturer         | Dilution | Species |
|----------|----------------------|----------|---------|
| CCL2     | Abcam, Cambridge, UK | 1:100    | Rabbit  |
| CXCL10   | Abcam, Cambridge, UK | 1:100    | Mouse   |
| Nestin   | Abcam, Cambridge, UK | 1:100    | Mouse   |
| Nestin   | Proteintech, USA     | 1:100    | Rabbit  |
| CD163    | Abcam, Cambridge, UK | 1:100    | Mouse   |
| CD163    | Abcam, Cambridge, UK | 1:100    | Rabbit  |
| CD16     | Abcam, Cambridge, UK | 1:100    | Mouse   |
| CD16     | Abcam, Cambridge, UK | 1:100    | Rabbit  |
| Iba-1    | Abcam, Cambridge, UK | 1:100    | Mouse   |
| Iba-1    | Abcam, Cambridge, UK | 1:100    | Rabbit  |
